# Supplementary material for: Spinocerebellar Ataxia type 17 presenting with progressive myoclonic epilepsy
Source: PubMed Central journal article supplement — eNeurologicalSci. 2023 Apr 15;31:100463. doi: 10.1016/j.ensci.2023.100463 (PMC10160684; doi:10.1016/j.ensci.2023.100463), 2023-04-15
Supplement: mmc2.pdf [file mmc2.pdf]

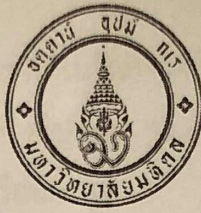

เอกสารแสดงความยินยอมในการเผยแพร่ภาพและ/หรือข้อมูลที่เกี่ยวข้องกับผู้ป่วย  
คณะกรรมการจริยธรรมวิจัยในคน คณะแพทยศาสตร์โรงพยาบาลรามาธิบดี

ชื่อผู้ป่วย: น.ส. สุชัยรัตน์ อังสุวานิช

การให้ความยินยอม

ข้าพเจ้า นางสมศักดิ์ อังสุวานิช [ชื่อ นามสกุล ตัวบรรจง]

ยินยอมให้ใช้ข้อมูลเกี่ยวกับข้าพเจ้า/ผู้ป่วย. ในการรายงานในวารสารทางการแพทย์/ตำรา/หนังสือได้ โดยผู้ขอความ  
ยินยอม คือ นพ/พญ. อภิสิทธิ์ มุขะเกด สังกัด โรงพยาบาลรามาธิบดี

คณะแพทยศาสตร์โรงพยาบาลรามาธิบดี มหาวิทยาลัยมหิดล

ข้าพเจ้ายืนยันว่าข้าพเจ้า (กรุณาทำเครื่องหมายเลือกช่องต่าง ๆ เพื่อยืนยัน)

- ได้ดูรูปภาพ/วิดีโอ(หากมี) รับทราบข้อความหรือข้อมูลอื่น ๆ เกี่ยวกับข้าพเจ้า/ผู้ป่วยแล้ว
- ได้รับทราบรายละเอียดที่จะมีการรายงาน/ตีพิมพ์ ในวารสารทางการแพทย์/ตำรา/หนังสือ โดยไม่มีการ  
ระบุ ชื่อ-สกุล ของข้าพเจ้า/ผู้ป่วย แล้ว
- รับทราบสิทธิตามกฎหมายที่จะให้ หรือ ไม่ให้ความยินยอมนี้ว่า ไม่มีผลต่อการรักษาพยาบาลที่พึงได้รับ

ข้าพเจ้าเข้าใจในเรื่องดังต่อไปนี้:

- 1) ข้อมูลดังกล่าวจะได้รับการเผยแพร่ โดยไม่มีชื่อ-สกุล ของข้าพเจ้า/ผู้ป่วย อย่างไรก็ตามข้าพเจ้าเข้าใจว่าแพทย์ผู้ขอ  
ความยินยอมไม่สามารถรับรองการเก็บรักษาเป็นความลับได้ทั้งหมด อาจเป็นไปได้ว่าอาจมีบางคนจดจำข้าพเจ้า/  
ผู้ป่วยได้ ตัวอย่างเช่น บุคคลที่ให้การดูแลข้าพเจ้า/ผู้ป่วย ผู้ป่วยคนอื่น หรือญาติ
- 2) ข้อมูลอาจแสดงรายละเอียดเกี่ยวกับภาวะทางการแพทย์หรืออาการป่วยของข้าพเจ้า/ผู้ป่วย และการพยากรณ์โรค  
การรักษา หรือการผ่าตัดที่ข้าพเจ้า/ผู้ป่วยมี เคยมี หรืออาจมีในอนาคต



3) บทความดังกล่าว (รวมถึงรูปภาพ/วิดีโอ) อาจได้ในรับการตีพิมพ์ในวารสาร/ตำรา/หนังสือ ที่เผยแพร่ไปทั่วโลก สามารถสืบค้นได้ทางอินเทอร์เน็ต และจะคงอยู่ตลอดไป หลัก ๆ แล้วผู้อ่านได้แก่ แพทย์และบุคลากรทางการแพทย์ แต่ยังมีบุคคลอื่น ๆ อีกได้แก่ นักวิชาการ นักศึกษาหรือนักข่าว

4) บทความ รวมทั้งข้อมูลดังกล่าวหลังการตีพิมพ์เผยแพร่ อาจอยู่ในข่าวประชาสัมพันธ์ หนังสือพิมพ์ และอาจมีการแชร์ผ่านสื่อสังคมออนไลน์ (เช่น ไลน์ เฟสบุ๊ก ทวิตเตอร์) และอาจมีเผยแพร่ในเว็บไซต์อื่น ๆ ด้วยเช่นกัน

5) ข้าพเจ้า/ผู้ป่วยจะไม่ได้รับประโยชน์ทางการเงินใด ๆ จากการตีพิมพ์ในวารสาร/ตำรา/หนังสือ ดังกล่าว

6) ข้าพเจ้าสามารถเพิกถอนความยินยอมของข้าพเจ้าเมื่อใดก็ได้ก่อนการตีพิมพ์เผยแพร่ แต่เมื่อบทความดังกล่าวได้รับเข้าสู่กระบวนการตีพิมพ์เผยแพร่แล้ว จะไม่สามารถเพิกถอนความยินยอมได้

7) เอกสารแสดงความยินยอมฉบับนี้ จะได้รับการเก็บรักษาไว้อย่างปลอดภัยและเป็นความลับ โดยเป็นไปตามพระราชบัญญัติคุ้มครองข้อมูลส่วนบุคคล

|                    |                                   |
|--------------------|-----------------------------------|
| ลงนาม: นายสมศักดิ์ | ชื่อตัวบรรจง: สมศักดิ์ อังชาดิษฐ์ |
|--------------------|-----------------------------------|

หากลงนามในนามของผู้ป่วย กรุณาระบุเหตุผลว่าเพราะเหตุใดผู้ป่วยจึงไม่ให้ความยินยอมด้วยตนเอง (เช่น ผู้ป่วยเสียชีวิต มีอายุต่ำกว่า 18 ปี หรือมีความบกพร่องในการรับรู้หรือสติปัญญา).....

โดยผู้ลงนามแทนมีความสัมพันธ์เป็น..... พี่ชาย ..... กับผู้ป่วย

วันที่:..... 27 ตค 2564 .....

|                                                                                                   |                   |
|---------------------------------------------------------------------------------------------------|-------------------|
| หากผู้ป่วยเป็นเด็กที่มีอายุตั้งแต่ 7 ปีขึ้นไป แต่น้อยกว่า 18 ปี จะต้องให้ความยินยอมด้วยตนเองด้วย: |                   |
| ลงนาม:                                                                                            | ชื่อเด็กตัวบรรจง: |
| วันเดือนปีเกิด :                                                                                  | วันที่:           |

|                                                                        |                                |
|------------------------------------------------------------------------|--------------------------------|
| บุคคลที่ได้อธิบายและให้เอกสารแสดงความยินยอมฉบับนี้แก่ผู้ป่วยหรือตัวแทน |                                |
| ลงนาม: อริสทธิ์ บุณเกิด                                                | ชื่อตัวบรรจง: อริสทธิ์ บุณเกิด |
| ตำแหน่ง: ผู้ช่วยศาสตราจารย์                                            |                                |
| หน่วยงาน: ปรชสาทวิทยา                                                  |                                |
| คณะแพทยศาสตร์โรงพยาบาลรามาธิบดี                                        |                                |
|                                                                        | วันที่: 27 ตค 2564             |
