# Supplementary material for: Spinocerebellar Ataxia type 17 presenting with progressive myoclonic epilepsy
Source: PubMed Central journal article supplement — eNeurologicalSci. 2023 Apr 15;31:100463. doi: 10.1016/j.ensci.2023.100463 (PMC10160684; doi:10.1016/j.ensci.2023.100463), 2023-04-15
Supplement: mmc4.pdf [file mmc4.pdf]

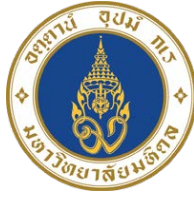

Human Research Ethics Committee, Faculty of Medicine Ramathibodi Hospital, Mahidol University  
 270 Rama 6 Rd. Phayatai Ratchathewi Bangkok 10400 Tel.(660)2012175, 2011544, 2010388  
 Website: <https://med.mahidol.ac.th/research/ethics>  
 E-mail: raec.mahidol@gmail.com

COA. MURA2021/1031

**Title of Project (English)** Spinocerebellar ataxia type 17 (SCA17) presenting with progressive myoclonic epilepsy (PME)

**Type of Review** Exemption from regular review

**Principal Investigator** Apisit Boongird, M.D.

**Official Address** Department of Medicine  
 Faculty of Medicine Ramathibodi Hospital Mahidol University

**Co-investigator (s)**  
 1. Teeratorn Pulkes, M.D.  
 2. Pichet Termsarasab, M.D.

**Approval includes**  
 1. Submission form protocol version 1 date 3/12/2021  
 2. Certificate in ethics training

Institutional Review Boards in Mahidol University are in full compliance with International Guidelines for Human Research Protection such as Declaration of Helsinki, The Belmont Report, CIOMS Guidelines and the International Conference on Harmonization in Good Clinical Practice (ICH-GCP)

**Date of Approval** December 07, 2021

**Date of Expiration** December 06, 2022

Signature of Chair.....

(Asst. Prof. Chusak Okascharoen, M.D., Ph.D.)

This certificate is subject to the following conditions:

- 1) Approval is granted only for the project with details described in submitted proposal
- 2) Submission of modification to the approved project is needed before implementation
- 3) A yearly progress report is required for renewing of approval
- 4) Written notification is required when the project is complete or terminated
